# Supplementary material for: Phytochemistry of Verbascum Species Growing in Iraqi Kurdistan and Bioactive Iridoids from the Flowers of Verbascum calvum
Source: PubMed Central journal article supplement (PMC7569995; doi:10.3390/plants9091066), 2020-08-20
Supplement: plants-09-01066-s001.pdf [file plants-09-01066-s001.pdf]

## SUPPLEMENTARY INFORMATION

### Phytochemistry of *Verbascum* species growing in Iraqi Kurdistan and Bioactive Iridoids from the Flowers of *Verbascum calvum*

Hawraz Ibrahim M. Amin, Faiq H. S. Hussain, Gianluca Gilardoni, Zaw Min Thu, Marco Clericuzio, Giovanni Vidari

#### NMR spectra of aucubin (43)

- Figure 1S.** <sup>1</sup>H-NMR spectrum (200 MHz) of aucubin (in CD<sub>3</sub>OD) page 2.  
**Figure 2S.** <sup>1</sup>H-NMR spectrum (300 MHz) of aucubin (in CD<sub>3</sub>OD) page 3.  
**Figure 3S.** <sup>13</sup>C-NMR spectrum (75 MHz) of aucubin (in CD<sub>3</sub>OD) page 4  
**Figure 4S.** LC-MS of aucubin in MeOH page 5

#### NMR spectra of ajugol (42)

- Figure 5S.** <sup>1</sup>H-NMR spectrum (200 MHz) of ajugol (in CD<sub>3</sub>OD) page 6.  
**Figure 6S.** <sup>1</sup>H-NMR spectrum (300 MHz) of ajugol (in CD<sub>3</sub>OD) page 7.  
**Figure 7S.** <sup>13</sup>C-NMR spectrum (75 MHz) of ajugol in (CD<sub>3</sub>OD) page 8  
**Figure 8S.** DEPT spectrum (75 MHz) of ajugol in (CD<sub>3</sub>OD) page 9  
**Figure 9S.** COSY spectrum (300 MHz) of ajugol (in CD<sub>3</sub>OD) page 10  
**Figure 10S.** LC-MS of ajugol in methanol page 11

#### Tumor cell viability test (MTS assay) of residues B'

- Figure 11S.** Bar-graphs of the antiproliferative activity of extract B' against A549 and MCF-7 tumor cell lines (MTS assay) page 12

V. calvum fl. n.7 in methanol 111 del 31-01-2012

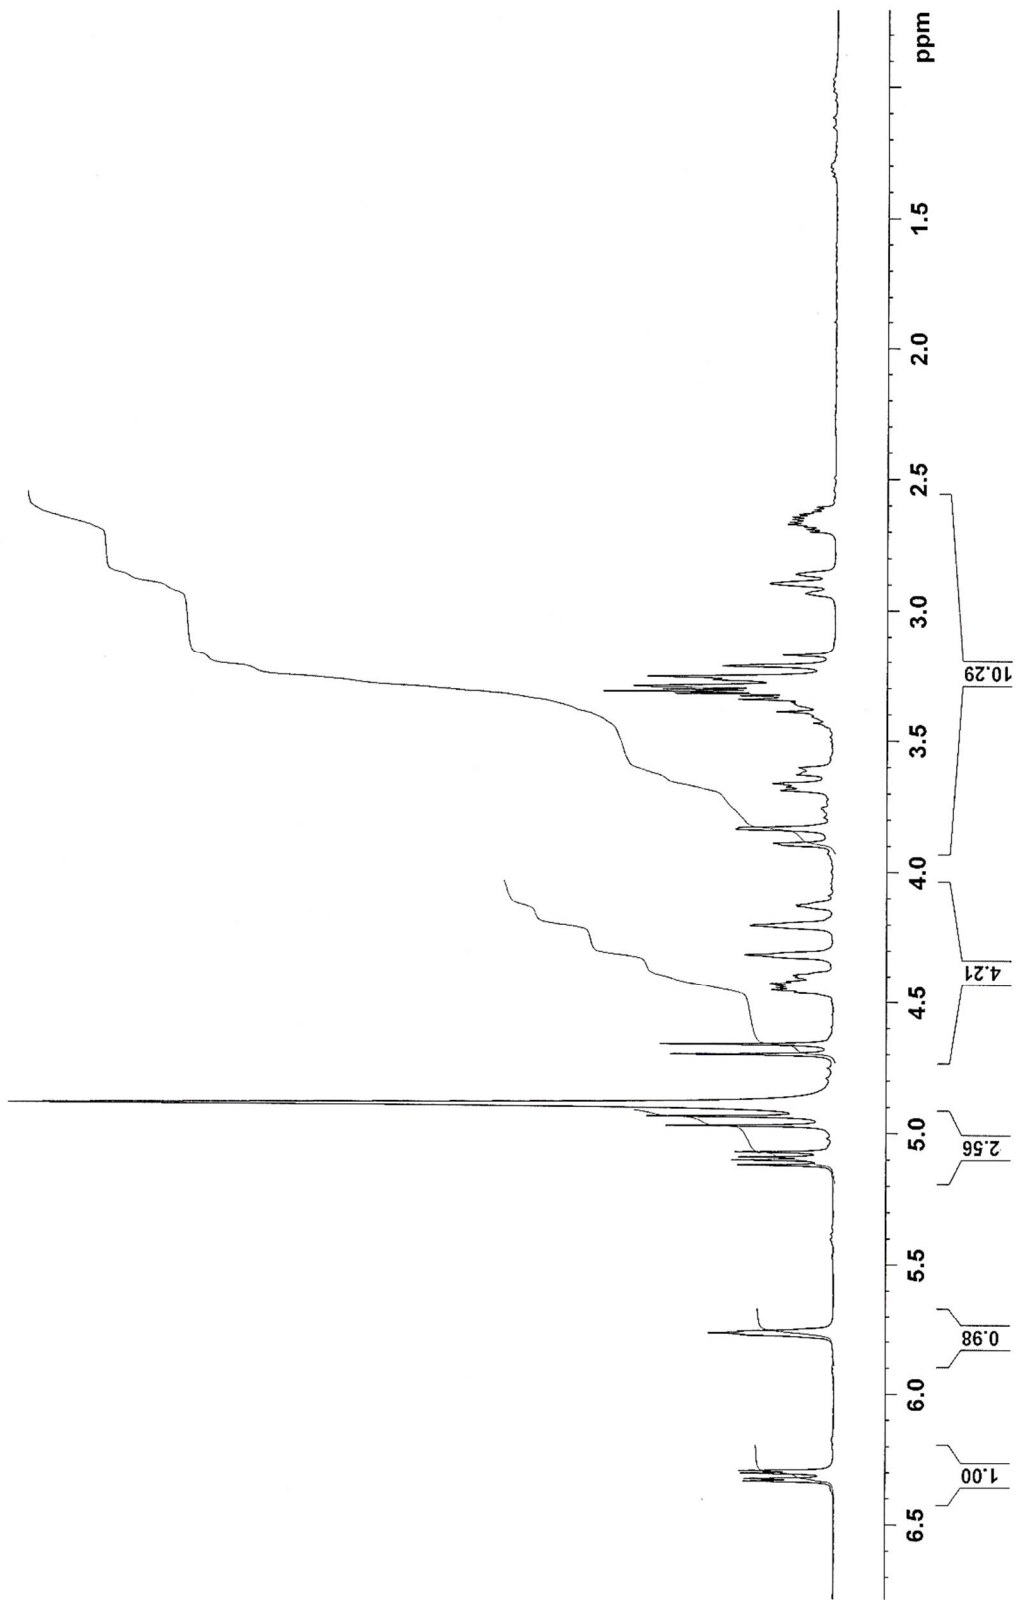

Figure 1S. <sup>1</sup>H-NMR spectrum (200 MHz) of aucubin (in CD<sub>3</sub>OD).

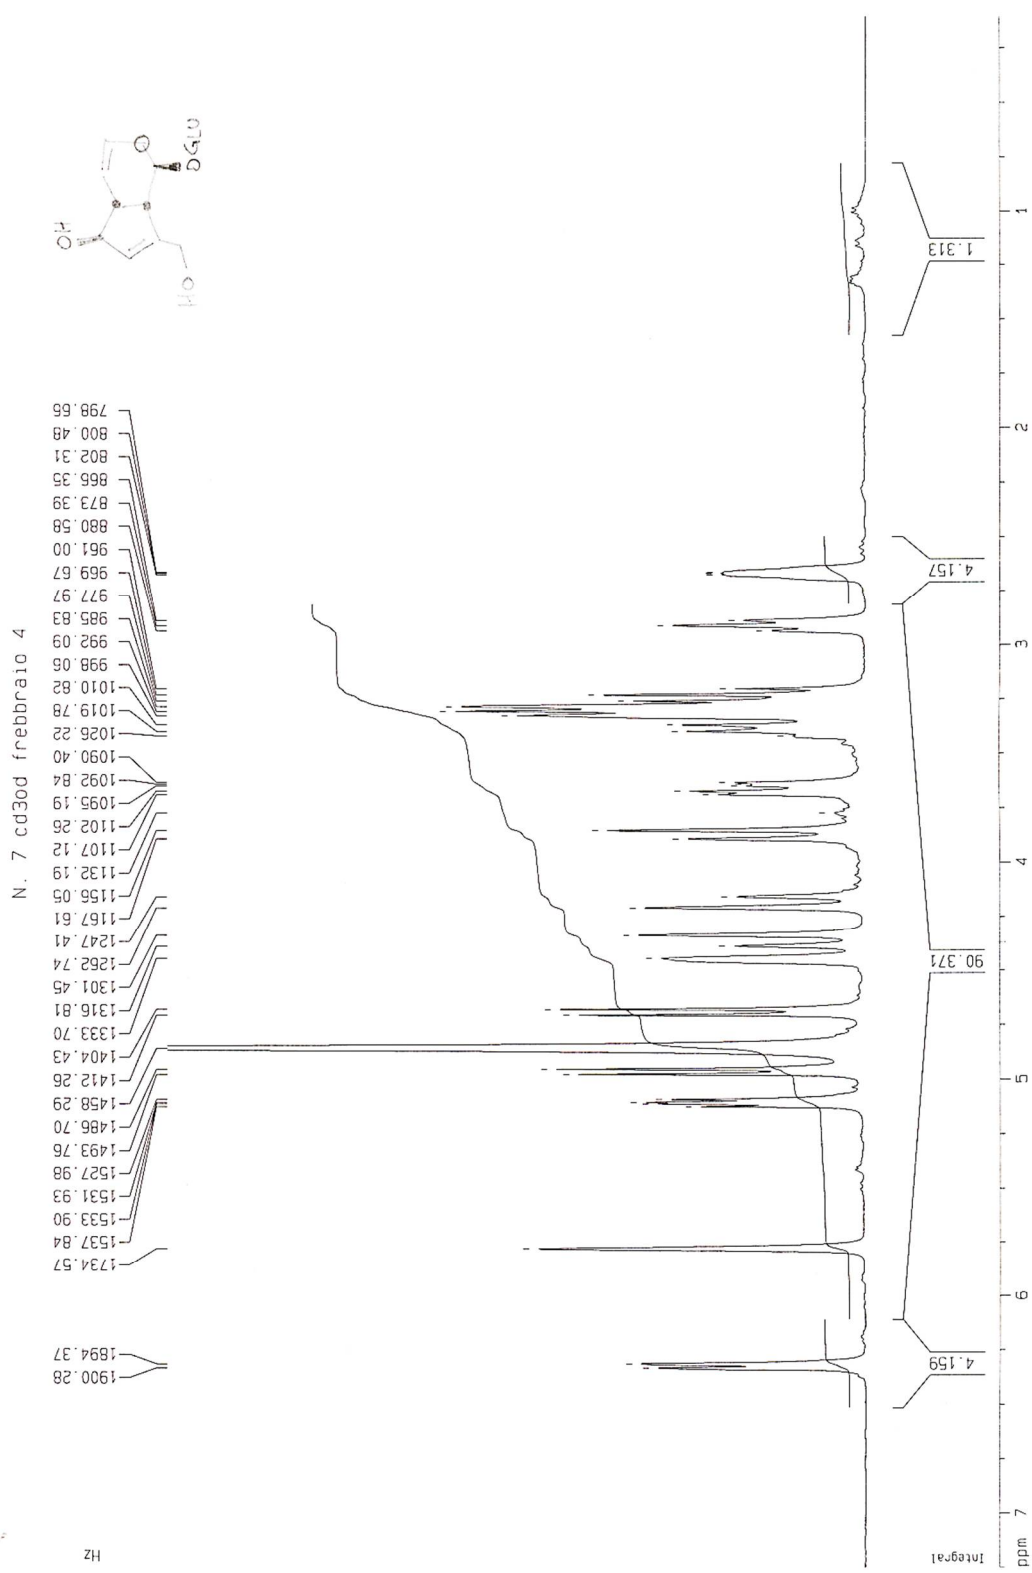

Figure 2S. <sup>1</sup>H-NMR spectrum (300 MHz) of aucubin (in CD<sub>3</sub>OD).

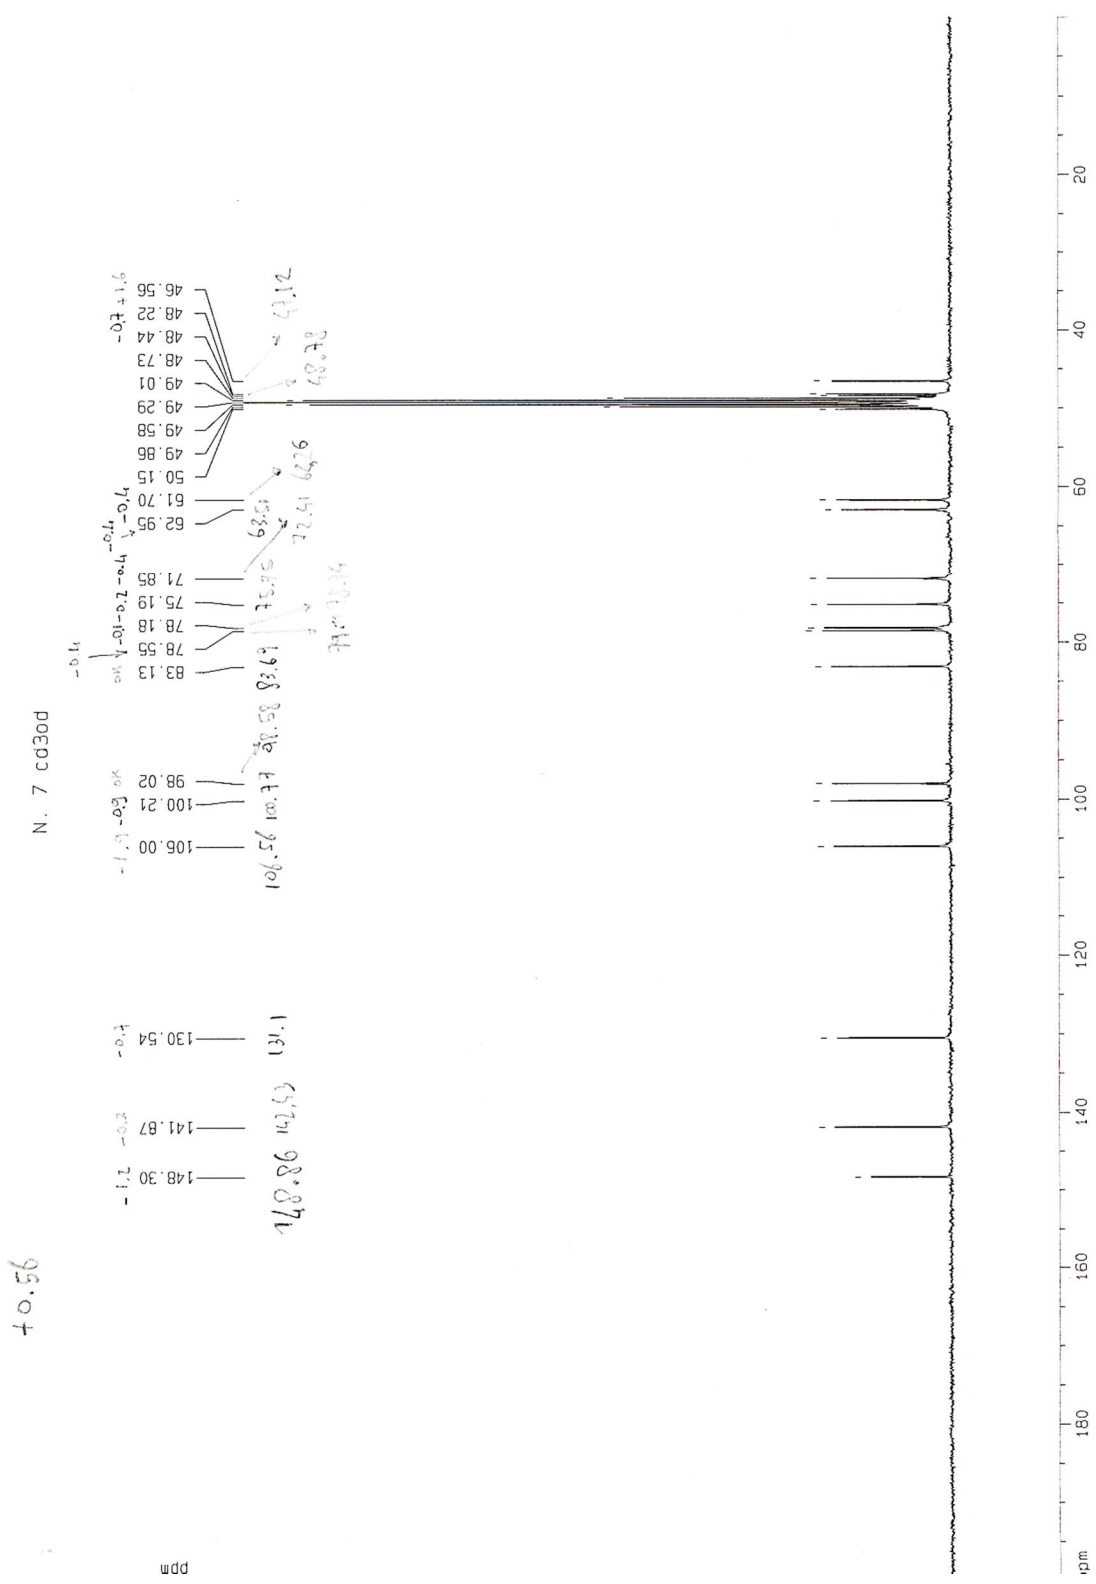

Figure 3S. <sup>13</sup>C-NMR spectrum (75 MHz) of aucubin (in CD<sub>3</sub>OD).

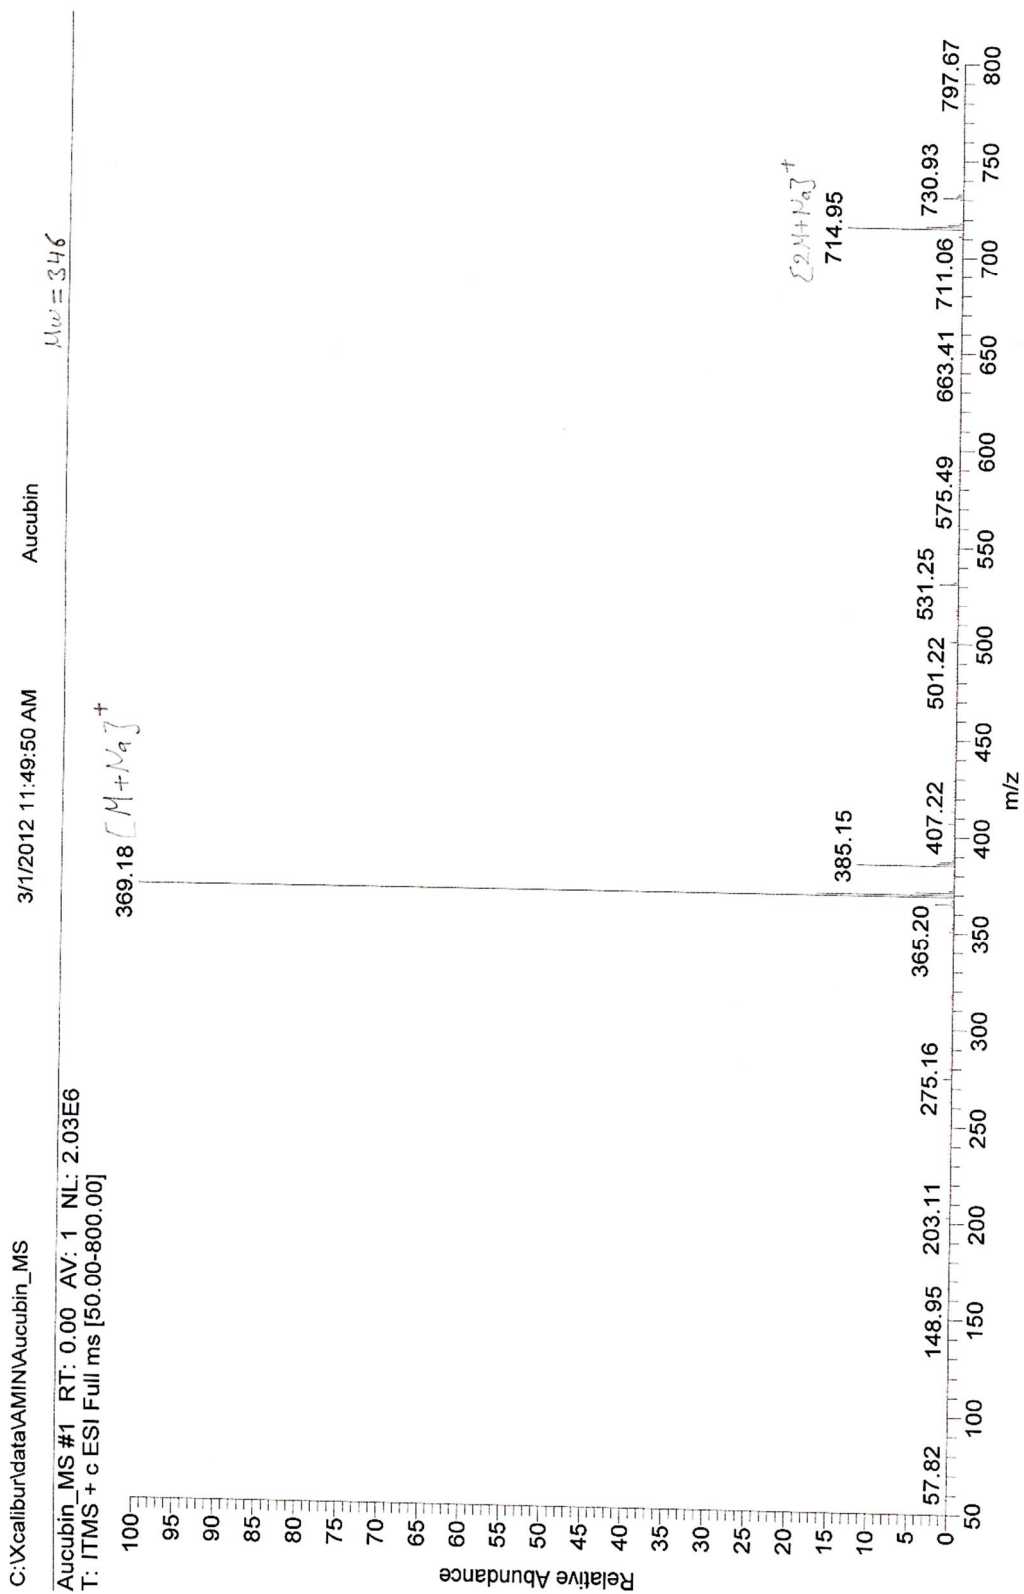

Figure 4S. LC-MS of aucubin in methanol.

V. calvum fl. n.7 in methanol 111 del 31-01-2012

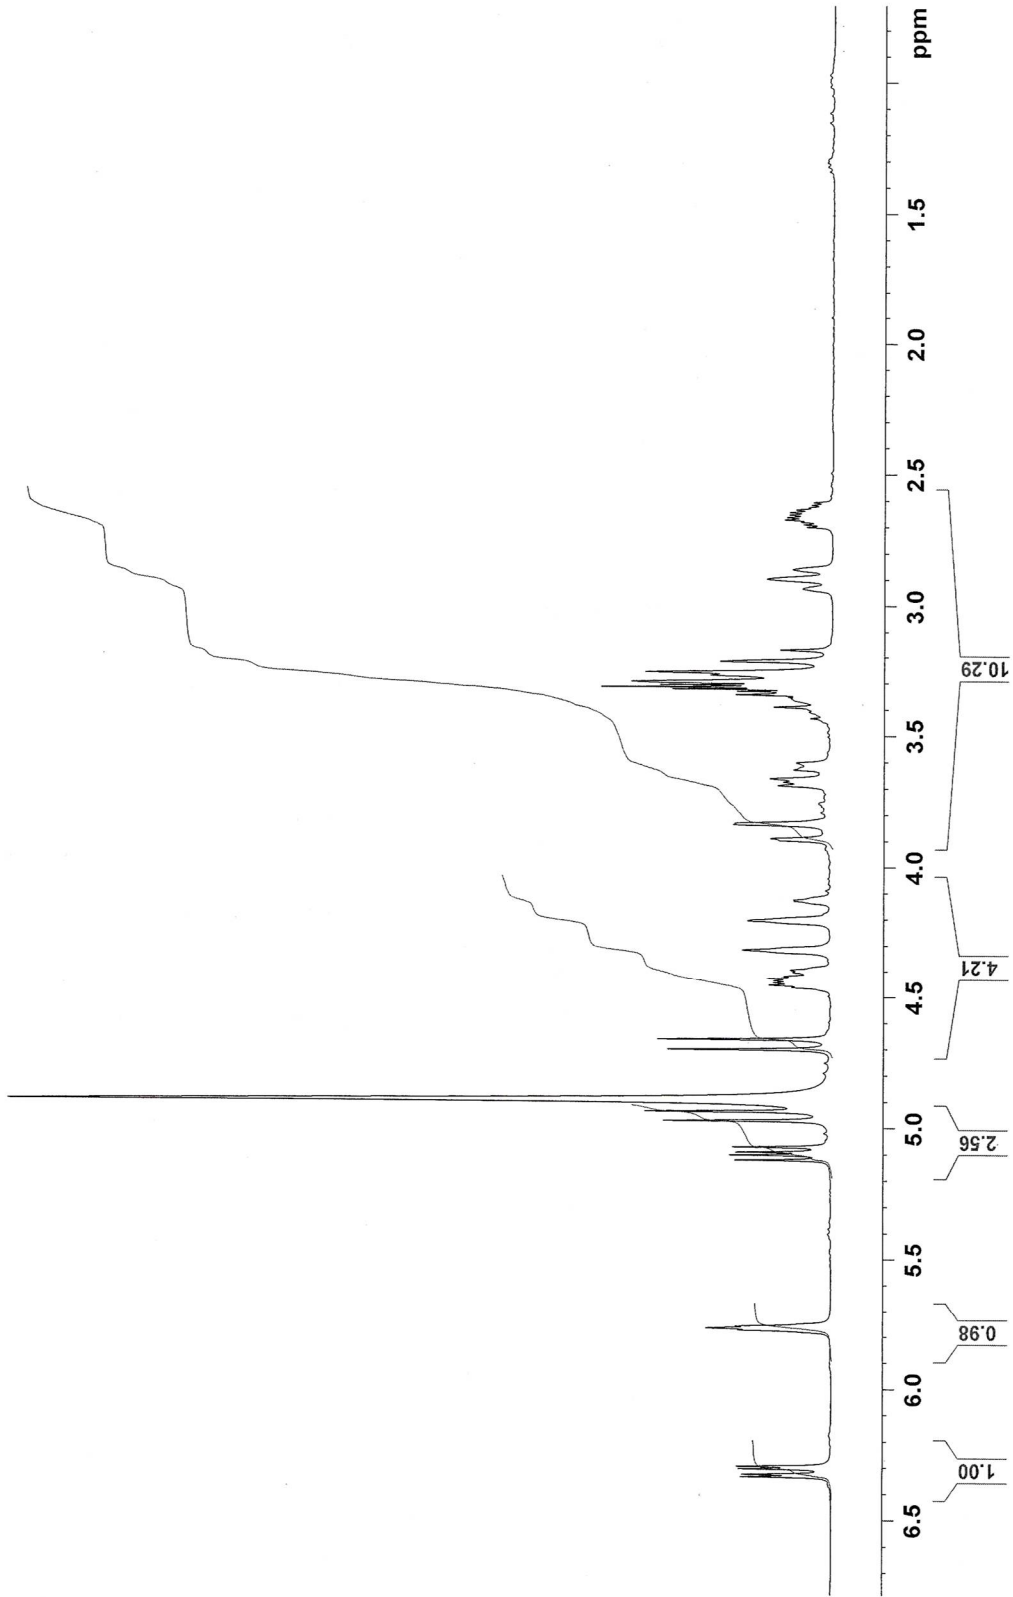

Figure 5S. <sup>1</sup>H-NMR spectrum (200 MHz) of ajugol (in CD<sub>3</sub>OD).

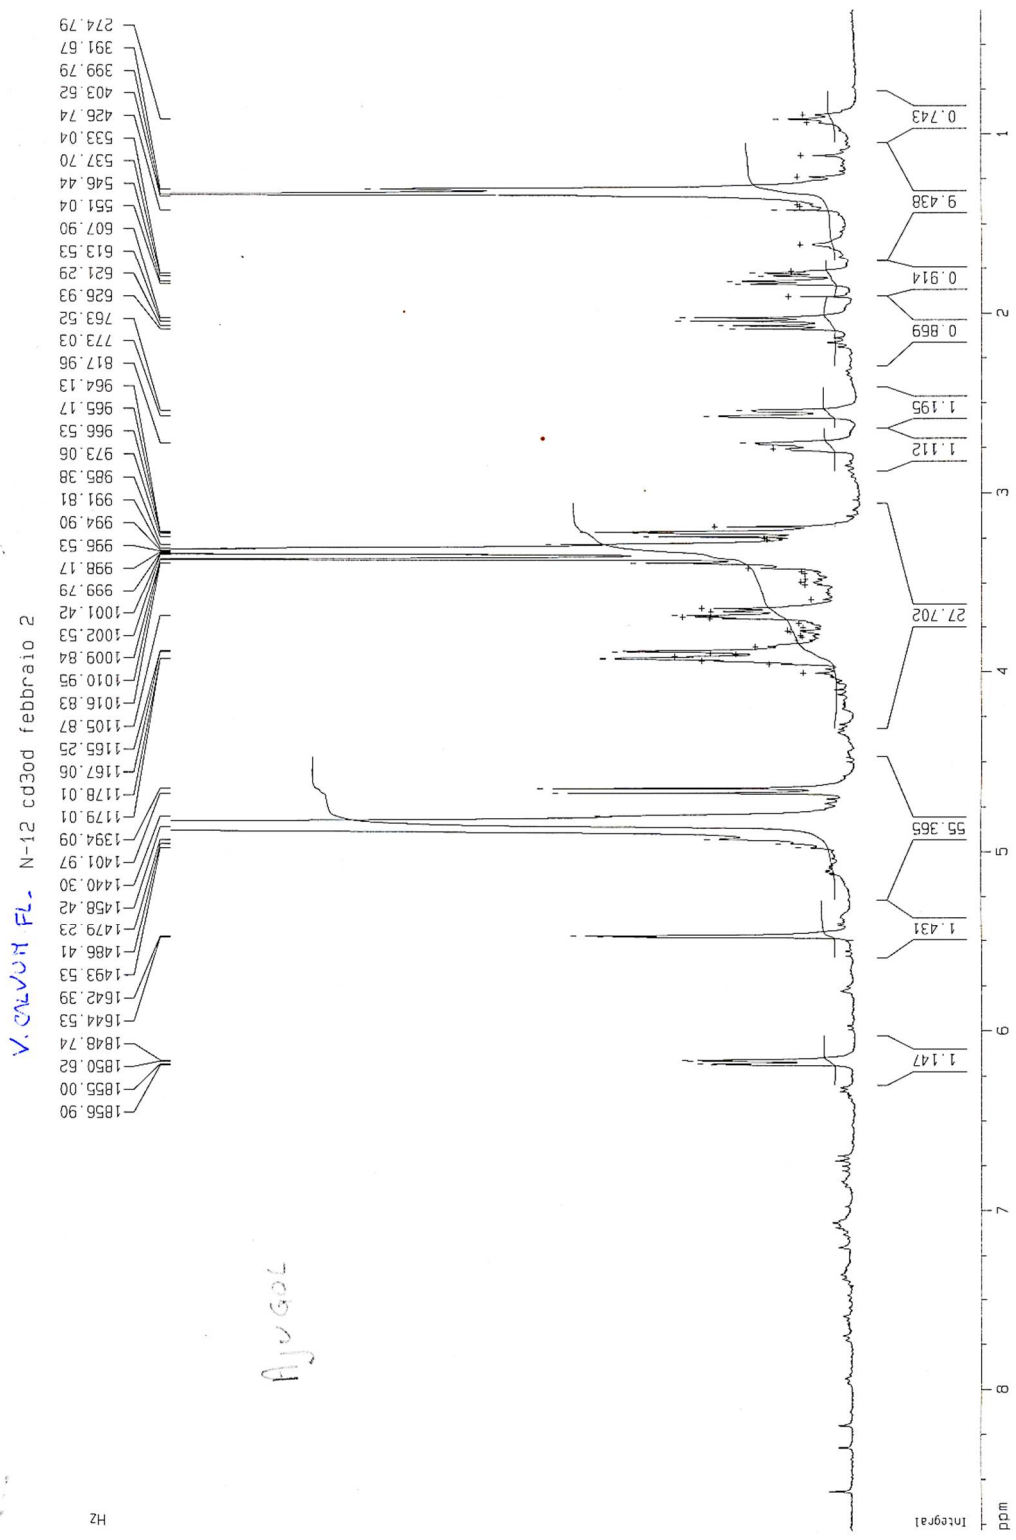

Figure 6S. <sup>1</sup>H-NMR spectrum (300 MHz) of ajugol (in CD<sub>3</sub>OD).

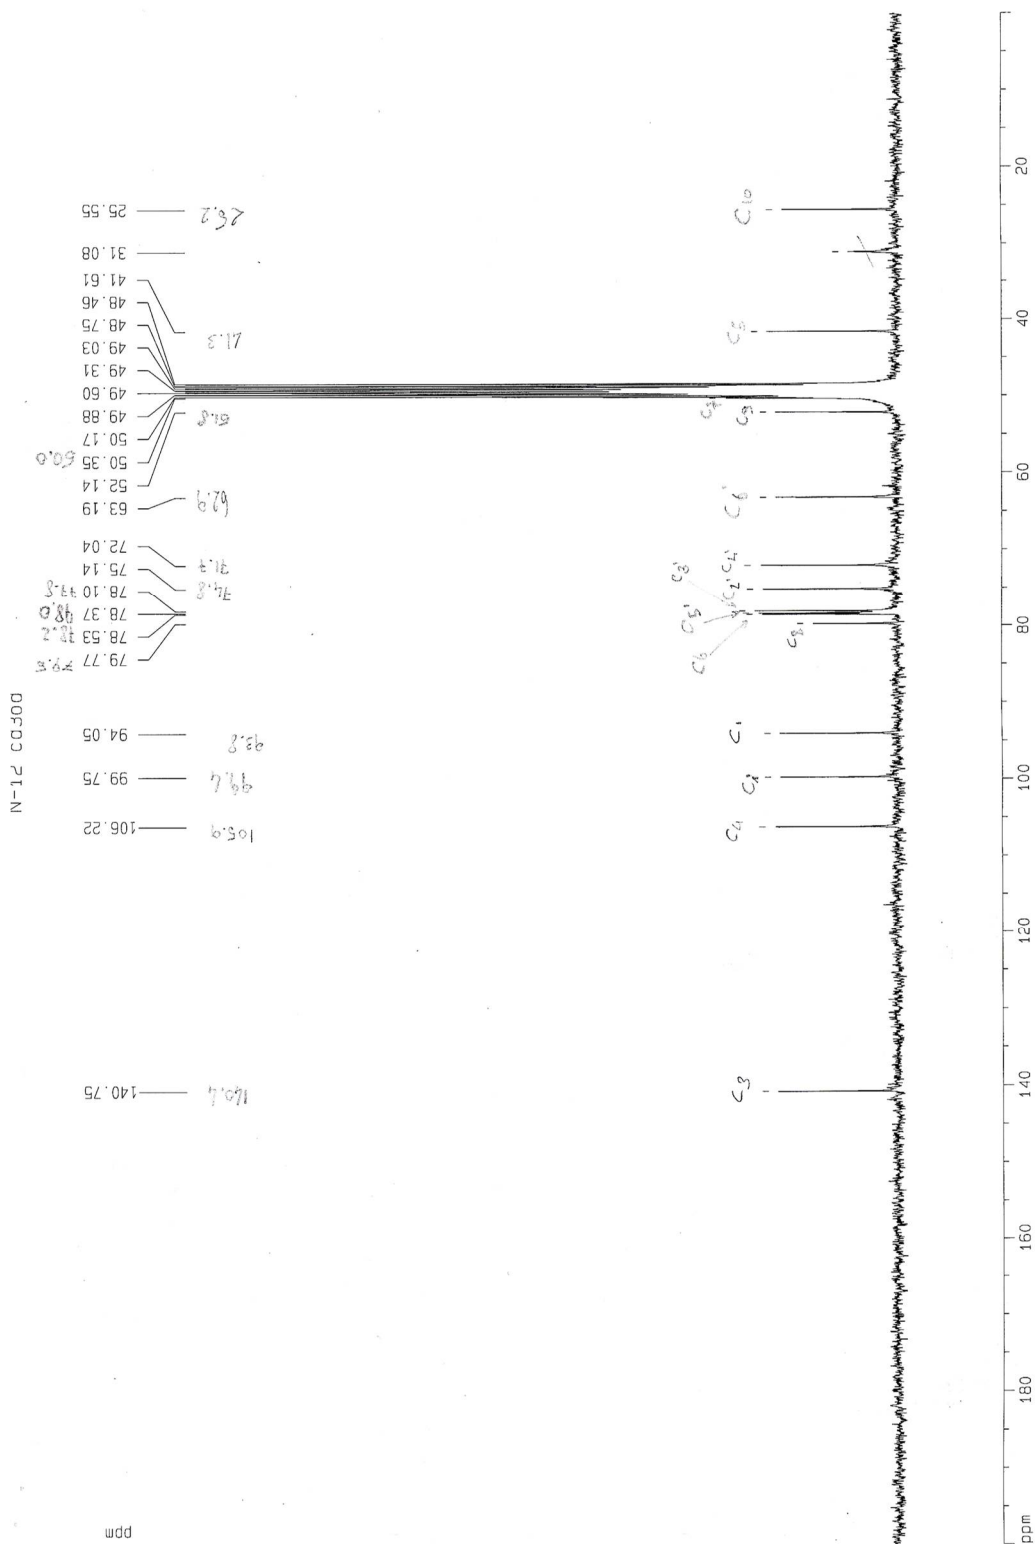

Figure 7S. <sup>13</sup>C-NMR spectrum (75 MHz) of ajujol in (CD<sub>3</sub>OD).



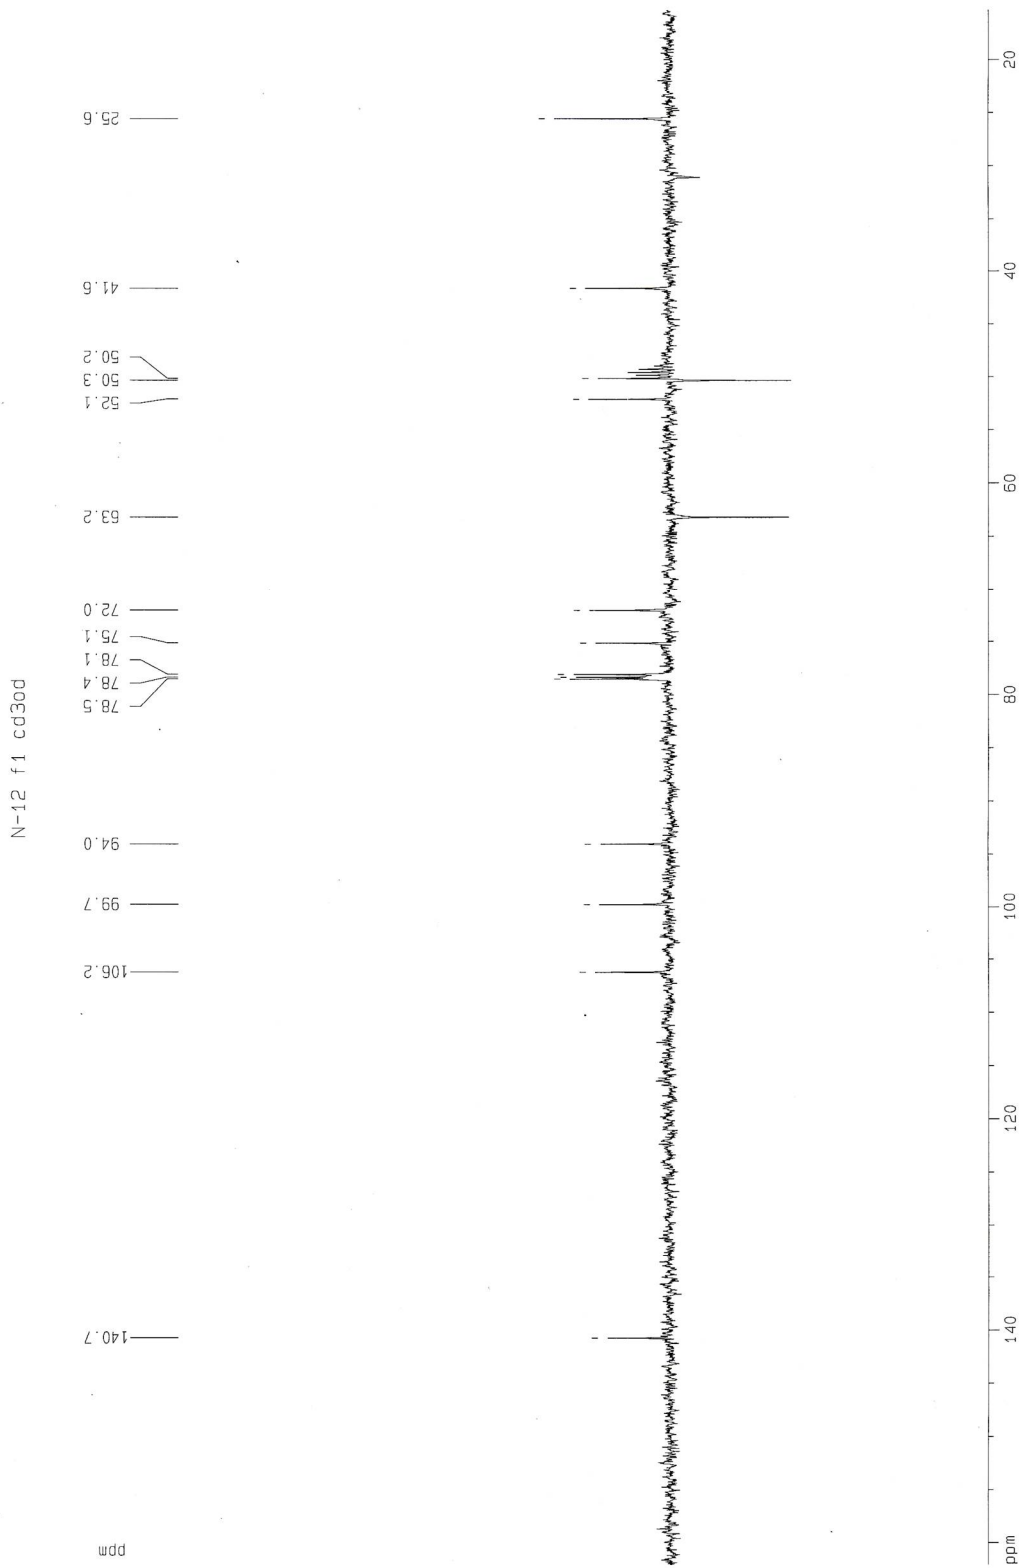

**Figure 8S.** DEPT spectrum (75 MHz) of ajugol in (CD<sub>3</sub>OD).

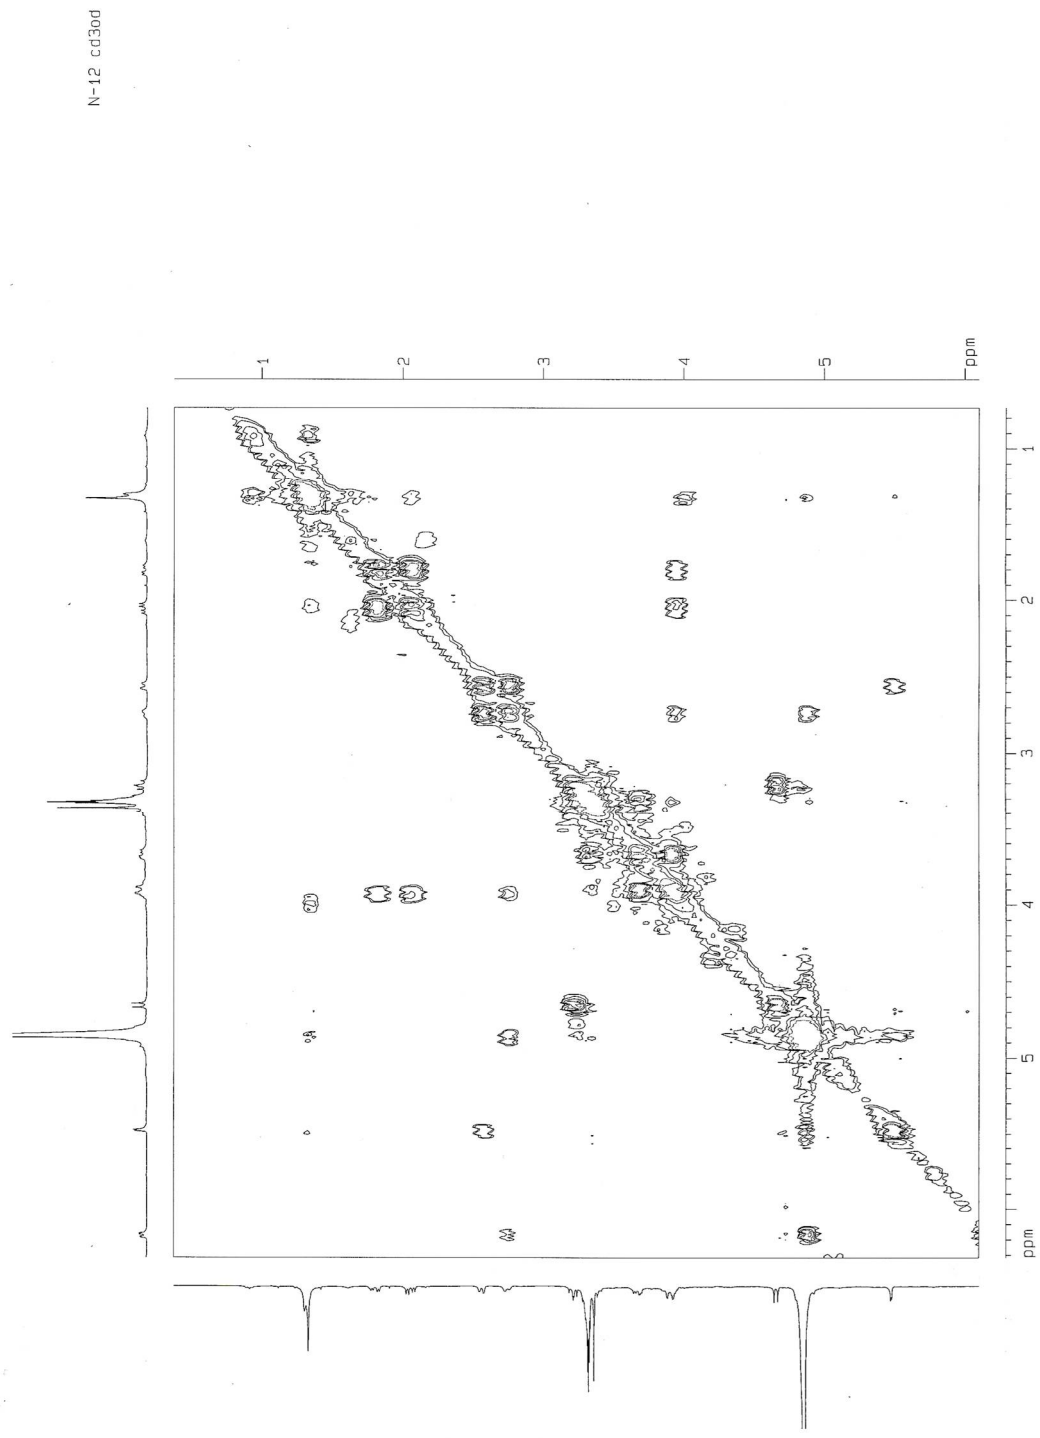

Figure 9S. COSY spectrum (300 MHz) of ajugol (in CD<sub>3</sub>OD).

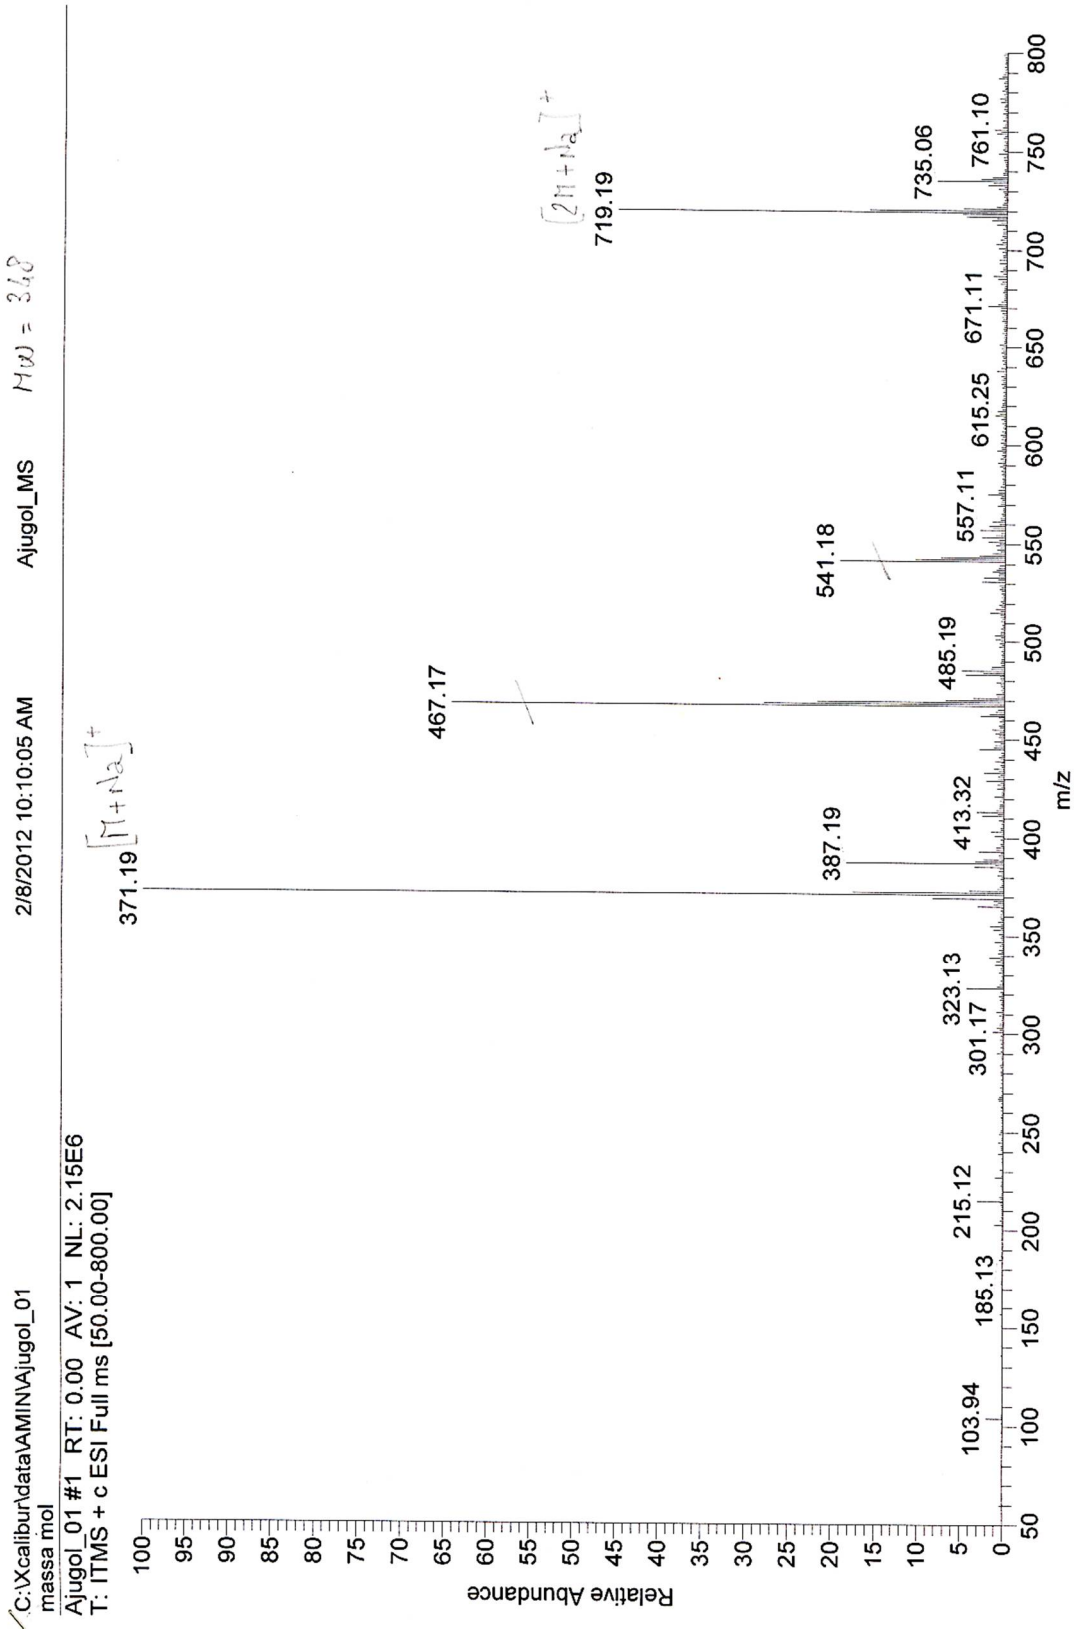

Figure 10S. LC-MS of ajugol in methanol.

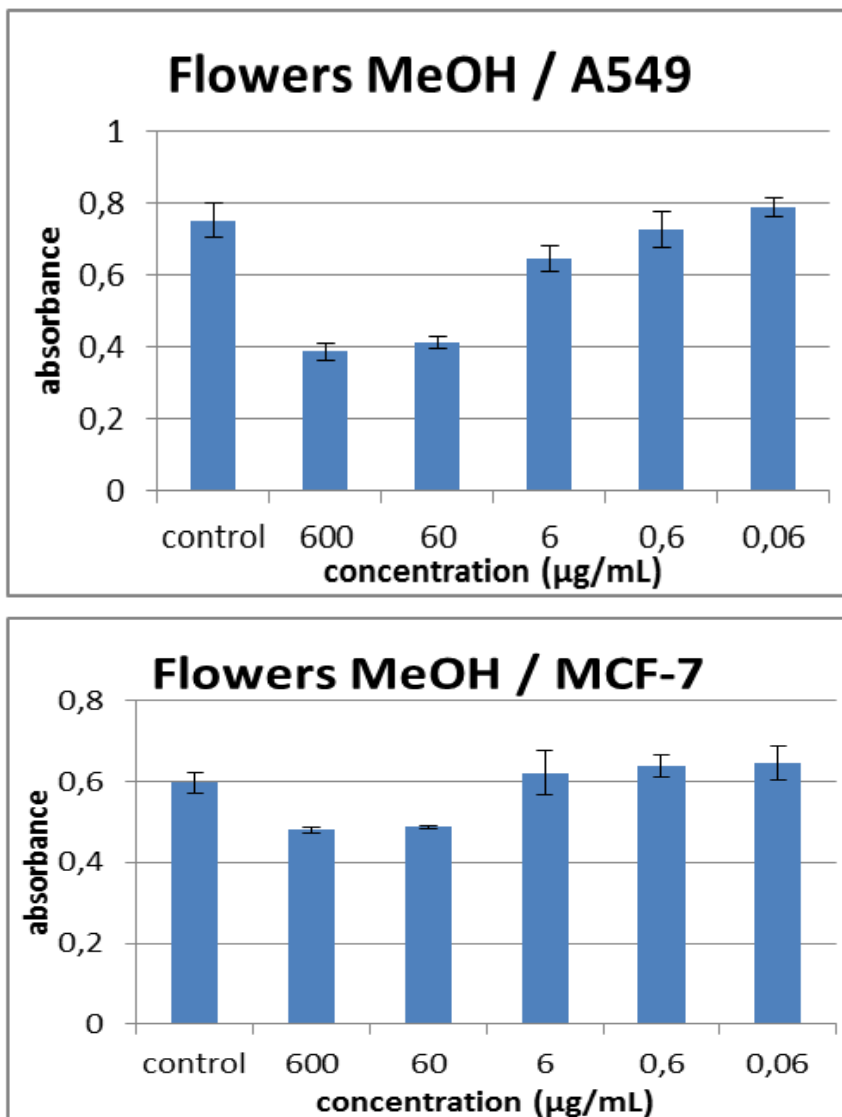

**Figure 11S.** Antiproliferative activity of extract B' against A549 and MCF-7 tumor cell lines (MTS assay). The percentages of growth inhibition of tumor cells (treated with different concentration of extract B'), compared to the control, are calculated from the absorbances at 490 nm.
